## Serine Phosphorylation Regulates the P-type Potassium pump KdpFABC

Marie E. Sweet<sup>1</sup>, Vikas Dubey<sup>2</sup>, Xihui Zhang<sup>1</sup>, Hediye Erdjument-Bromage<sup>1</sup>, Thomas A. Neubert<sup>1</sup>, Bjørn P. Pedersen<sup>3</sup>, Himanshu Khandelia<sup>2</sup>, David L. Stokes<sup>1</sup>

<sup>1</sup> Skirball Institute, Dept. of Cell Biology, New York University School of Medicine, New York, NY 10016 USA

<sup>2</sup> Dept. of Physics, Chemistry and Pharmacy, University of Southern Denmark, DK-5230 Odense M, Denmark

<sup>3</sup> Dept. of Molecular Biology and Genetics, Aarhus University, 8000 Aarhus-C, Denmark

### Abstract

KdpFABC is an ATP-dependent K<sup>+</sup> pump that ensures bacterial survival in K<sup>+</sup>-deficient environments. Whereas transcriptional activation of kdpFABC expression is well studied, a mechanism for down regulation when K<sup>+</sup> levels are restored has not been described. Here we show that KdpFABC is inhibited when cells return to a K<sup>+</sup>-rich environment. The mechanism of inhibition involves phosphorylation of Ser162 on KdpB, which can be reversed in vitro by treatment with serine phosphatase. Mutating Ser162 to Alanine produces constitutive activity, whereas the phosphomimetic Ser162Asp mutation inactivates the pump. Analyses of the transport cycle show that serine phosphorylation uncouples the pump and blocks the cycle after formation of the catalytic aspartyl phosphate intermediate (E1~P). Molecular dynamics simulations show that serine phosphorylation has allosteric effects that potentially explain the uncoupling. This regulatory mechanism, unique amongst P-type pumps, furthers our understanding of how bacteria control potassium homeostasis to maintain cell volume and osmotic potential.

### Introduction

Potassium is the primary osmolyte used by cells to maintain homeostasis and facilitate cell growth. A sizeable difference in K<sup>+</sup> concentration across the plasma membrane is largely responsible for setting the membrane potential, is essential for regulating intracellular pH, for generating turgor pressure required for cell growth and division and as an energy source for diverse transport processes (Altendorf et al., 2009; Epstein, 2003). When external K<sup>+</sup> concentrations are in the millimolar range, Trk and Kup are two constitutively expressed K<sup>+</sup> uptake systems that are sufficient to maintain K<sup>+</sup> homeostasis of bacteria. However, when extracellular K<sup>+</sup> concentrations fall into the micromolar range, a high-affinity, active transport system called Kdp takes over. The kdp genes, which underlie the only inducible K<sup>+</sup> transport system in bacteria, are organized into two tandem operons (kdpFABC and kdpDE). The latter is responsible for sensing the environment and controlling the expression of the former (Jung and Altendorf, 2002). The resulting KdpFABC protein complex is an ATP-dependent K<sup>+</sup> pump that has micromolar affinity for K<sup>+</sup> and is capable of generating a gradient up to six orders of magnitude, thus maintaining intracellular concentrations between 0.1 and 1M even when extracellular K<sup>+</sup> is present in trace amounts (Ballal et al., 2007).

Although the mechanisms for activating KdpFABC have been studied in considerable detail, the field has largely overlooked the need to suppress the pump once external  $K^+$  levels return to the millimolar range. On the one hand, it is clear that activation of transport is done at the transcriptional level via KdpD/E, a two-component system in which KdpD serves as the sensor kinase and KdpE as the response regulator (Walderhaug et al., 1992). When the cell's need for  $K^+$  is not being met, KdpD phosphorylates and thus activates KdpE, which then induces expression of the KdpFABC pump (Jung et al., 2012). The signal acting on KdpD is still controversial, with recent studies providing evidence for external  $K^+$  concentration (Laermann et al., 2013), internal  $Na^+$  or  $NH_4^+$  concentrations (Epstein, 2015) or dual binding sites for  $K^+$  that sense the magnitude of the gradient across the membrane (Schramke et al., 2016). On the other hand, inhibition of transport by KdpFABC has been observed when cells are returned to  $K^+$ -rich media (Rhoads et al., 1978; Roe et al., 2000). Inhibition of transport under these conditions is a logical necessity to prevent wasteful usage of ATP and a skyrocketing of the intracellular  $K^+$  concentration. Although elevated  $K^+$  levels do result in transcriptional repression, this is an unlikely explanation for the observed inhibition because the effect is far more rapid (<2 min in  $K^+$  rich media) than the documented rate of protein turnover in bacteria (Trotschel et al., 2013). Indeed, the authors reporting this effect speculated that existing KdpFABC molecules may be directly inhibited by some unreported mechanism (Roe et al., 2000).

Recent structural analysis revealed phosphorylation of a serine residue in a cytoplasmic domain of the KdpB subunit within a highly conserved sequence motif (Huang et al., 2017). This observation was surprising, given the prominence of this motif (TGES<sup>162</sup>) in the catalytic cycle of related P-type ATPases and the lack of precedent for an analogous post-translational modification in this well-studied superfamily of ATP-dependent cation pumps (Palmgren and Nissen, 2011). P-type ATPases including KdpB share a reaction cycle known as the Post-Albers scheme (Fig. 1) that begins with formation of an aspartyl phosphate on a conserved sequence (D<sup>307</sup>KTGT) in the centrally located cytoplasmic domain (P-domain). This phosphoenzyme intermediate (E1~P) transiently harnesses the energy of ATP, which is then used to drive conformational changes that lead to ion transport. The highly conserved TGES motif is found in a second cytoplasmic domain (A-domain) with Glu161 playing a crucial role in hydrolysis of the aspartyl phosphate in the second half of the catalytic cycle (E2-P → E2) (Møller et al., 2010). Biochemically, The E1~P and E2-P states are distinguished by their reactivity to ADP, with the former, high-energy form rapidly dephosphorylating to produce ATP whereas the latter, low-energy is unreactive (Toustrup-Jensen et al., 2001). An X-ray structure of KdpFABC showed that Ser162, which is immediately adjacent to this catalytic glutamate residue, carried a phosphate moiety and the ability of a protein phosphatase to increase ATPase activity suggested that phosphorylation of Ser162 was inhibitory (Huang et al., 2017). This crystal structure also revealed an interaction between the phosphate moiety and positively charged residues on the third cytoplasmic domain (N-domain), suggesting a possible mechanism for this inhibition. However, subsequent cryo-EM structures from another group which also showed phosphorylation of Ser162 (Stock et al., 2018), revealed different conformations indicating that the interaction between A- and N-domains was not stable and therefore probably not the mechanism of inhibition.

To further explore the inhibitory effects of serine phosphorylation, we have established growth conditions that lead to phosphorylation of Ser162 on KdpB and have characterized its effect on individual steps in the reaction cycle. Consistent with previous observations (Roe et al., 2000), when wild-type (WT) KdpFABC was expressed using the native promoter at low  $K^+$

concentrations, we found that moving cells to  $K^+$ -rich media resulted in an inhibition of ATPase activity. We found that KdpFABC inhibition was time-dependent, was proportional to the extent of serine phosphorylation, and was restored by removing the phosphate with lambda protein phosphatase (LPP). To elucidate the mechanism of inhibition, we expressed a variety of mutants using the pBAD promoter in cells grown in  $K^+$ -rich media and measured steady-state levels of the aspartyl phosphate intermediates (EP). We introduced the KdpB-S162D mutation to mimic the effect of serine phosphorylation, the KdpB-S162A mutation to prevent serine phosphorylation. We found that although EP levels for KdpB-S162A mutant were  $K^+$ -dependent, phosphorylation of Ser162 or the phosphomimetic S162D mutation eliminated this  $K^+$ -dependence. Pulse chase studies with ADP indicated that serine phosphorylation trapped the pump in the E1~P state. Molecular dynamics (MD) simulations were used to characterize the dynamics of the protein. These simulations showed that, when Ser162 was phosphorylated, there was a dramatic increase in mobility of the cytoplasmic domains of KdpB. Structural changes in the region linking the first two transmembrane helices with these cytoplasmic domains suggest that this may be a site of allosteric coupling that controls ion transport.

## RESULTS

### Expression of KdpFABC

We used three different expression strains and a variety of different growth conditions to study the physiological stimulus for serine phosphorylation and to produce KdpFABC for in vitro experiments (Fig. 2, Suppl. Table 1). In native *E. coli* cells, the promoter that controls transcription of *kdpFABC* genes is regulated by KdpE in response to " $K^+$  need" of the cell. In  $K^+$  replete conditions, KdpFABC is not expressed, but when  $K^+$  levels in the media fall into the micromolar range, the constitutive transport systems (Trk, Kup) fail to maintain the necessary chemo-osmotic gradient. KdpD senses this deficiency and activates KdpE such that transcription of *kdpFABC* is initiated. WT KdpFABC is a very powerful pump, so the deficit is normally overcome by modest levels of expression. In order to obtain over expression, as required for structural or biochemical studies, a multicopy plasmid with *kdpFABC* driven by the native promoter is introduced into cells (TK2499) with Trk and Kup knocked out and culture conditions include limiting concentrations of  $K^+$ , which are in the low micromolar range for WT KdpFABC (Epstein and Davies, 1970). Because *kdpFABC* expression serves to rescue these cells, mutants with lower activity cannot survive in these conditions and, in those cases, limiting concentrations that allow cell growth and produce robust expression depend on the  $K^+$  affinity and/or turnover rate of the particular mutant (e.g., 0.2 mM affinity for the KdpA-Q116R mutation used for the Xray structure). Inactive mutants cannot be expressed using this strategy, because they are incapable of rescuing cell growth in a  $K^+$  deficient environment. In those cases, the pBAD promoter can be used for expression with Top10 cells in  $K^+$  replete conditions (e.g., for previous cryo-EM structures), or a chromosomal copy of the *kdpFABC* gene can be used for rescue (TK2498 cells) and the mutant protein can be expressed from a plasmid carrying the native promoter. In this case, a His-tag is used to separate the mutant from the chromosomal copy by affinity chromatography. In the following studies, we have used all three expression strategies. As we learned over the course of this work, the  $K^+$  concentration in the culture media is key to serine phosphorylation, making the expression protocol an important parameter to keep in mind.

## Survey of KdpFABC mutants reveals unexpected inhibition

An overarching goal of our work is to understand the allosteric coupling between KdpA and KdpB that underlies ATP-dependent  $K^+$  transport. To this end, we setup a survey of alanine substitution mutants to assess the role of various residues implicated by the X-ray crystal structure. For expression of these mutants, we used *E. coli* strain TK2498 grown at 0.2 mM  $K^+$  (Fig. 2, Suppl. Table 1). After purification, the ATPase activities of all of the mutants were very low (Fig. 3a), causing us to explore parameters that might have influenced the protein. Based on our earlier evidence that phosphorylation of Ser162 in KdpB is inhibitory (Huang et al., 2017), we used mass spectrometry to determine levels of this post-translational modification (Suppl. Fig. S1), which were all extremely high (Fig. 3b). We then used LPP to remove the phosphate and observed significant stimulation in ATPase activity for several of these mutants (Fig. 3c), thus supporting an inhibitory role for Ser162 phosphorylation. WT protein and the D307A mutation in KdpB served as positive and negative controls, respectively. As expected, the D307A mutant was catalytically inactive because this residue is the site of aspartyl phosphate (E1~P) formation. In contrast to the mutants, the WT construct had virtually no serine phosphorylation. This is because the WT protein has much higher  $K^+$  affinity and was therefore expressed at much lower levels of  $K^+$  (<10  $\mu$ M) in the TK2499 strain. These results motivated us to examine whether phosphorylation of Ser162, and consequent inhibition of KdpFABC, was a cellular response to elevated  $K^+$  in the media.

## Increased $K^+$ is a physiological stimulus for serine phosphorylation

To test whether elevated  $K^+$  concentrations lead to serine phosphorylation, we first grew TK2499 cells with WT KdpFABC under  $K^+$  limiting (micromolar) conditions and then split the culture into two batches immediately prior to harvest. To one batch we added 20 mM  $K^+$  - so called  $K^+$  shock - and growth was continued for 20 min. KdpFABC was then purified from both batches. ATPase assays documented a 40% inhibition for protein derived from the cells subjected to the  $K^+$  shock, which was fully restored after treatment with LPP (Fig. 4a). Mass spectrometry confirmed that  $K^+$  shock produced a higher level of serine phosphorylation: ion currents for the phosphorylated peptide relative to the unphosphorylated peptide were 27% for  $K^+$  shock vs 1% for the control (Fig. 4b). This quantification is nominal because phosphorylated and nonphosphorylated versions of the same peptide are not ionized and detected with equal efficiency and, as a result, positive ion mass spectrometry typically underestimates the level of phosphorylation (Xu et al., 2005). However, relative phosphorylation levels of different samples are reliable (Huang et al., 2016) and these data show that the  $K^+$  shock resulted in phosphorylation of Ser162 as well as inhibition of ATPase activity.

## Time dependence of serine phosphorylation

To extend these studies, we varied the length of time that cells were subjected to  $K^+$  shock in order to characterize the time dependence of the response. For each experiment, the culture was split, 20 mM added to one half and incubated for either 0, 10, or 90 min before harvesting the cells. The incubation time is nominal given that cells had continued exposure to the media during the ensuing 20-min centrifugation step. ATPase inhibition increased as incubation time increased (15%, 25%, and 74%) and LPP treatment largely relieved this inhibition (Fig. 4c). In addition to mass spectrometry, we used SDS-PAGE together with Phos-tag stain (Suppl. Fig. S2) to quantify levels of serine phosphorylation. Results from mass spectrometric phosphorylation analysis were consistent with this graded response to the  $K^+$  shock (increased phosphorylation levels of 2.07, 4.02 and 5.23 fold, respectively) and confirmed

Ser162 as the site of phosphorylation (Suppl. Fig. S1). However, data from Phos-tag staining was more consistent across independent experiments and these data clearly illustrate a time-dependent increase in serine phosphorylation accompanied by loss of ATPase activity (Fig. 4d).

In addition to these isolated experiments, we conducted a time course in which a single culture was split into four batches that were shocked for varying times. In addition to a control, untreated batch, the cultures were exposed to 20 mM K<sup>+</sup> for 0, 20 and 60 min prior to harvesting the cells. ATPase activities of the corresponding preparations of KdpFABC show an increasing amount of inhibition, which was largely reversed by treatment with LPP (Fig. 4e), and increasing levels of serine phosphorylation (Fig. 4f). Aggregation of data from all of these experiments showed a clear correlation between ATPase activity and serine phosphorylation for both mass spectrometry (Fig. 4g) and Phos-tag staining (Fig. 4h). Although the mass spectrometry data showed a lot of scatter, it was well correlated with measurements from Phos tag staining (Fig. 4i). Combining the site specificity of mass spectrometry with the quantification accuracy of Phos-tag staining, provides strong evidence that a return to K<sup>+</sup>-rich media causes phosphorylation of Ser162 with a concomitant and proportional inhibition of ATPase activity.

### Effect of serine phosphorylation on partial reactions

Transient formation of an aspartyl phosphate at the catalytic site in the P-domain of KdpB is a key step in the reaction cycle. To evaluate how serine phosphorylation affects individual steps in the cycle, we used a conventional assay employing [<sup>32</sup>P]-ATP to initiate the cycle followed by acid quench at defined time intervals. This assay reports on steady-state levels of aspartyl phosphate (EP), which includes molecules in both E1~P or E2-P states (Fig. 1). These two states were then distinguished by their reactivity to ADP, based on the fact that the high-energy form (E1~P) is readily dephosphorylated by ADP, whereas the low-energy form (E2-P) is not (Toustrup-Jensen et al., 2001). For these studies, we introduced a number of mutations (Suppl. Table 1) to elucidate the effect of serine phosphorylation, a stable post-translational modification that is distinct from the transient phosphorylation of the catalytic Asp307. In particular, the KdpB-S162A mutation prevented serine phosphorylation and the KdpB-S162D mutation served as a surrogate for the fully phosphorylated protein. The KdpB-E161Q mutation is expected to block hydrolysis of the E2-P species (step 4 in Fig. 1), based on work with other P-type ATPases (Clausen et al., 2004), and KdpB-D307A serves as a negative control that prevents EP formation altogether. All of these mutations in KdpB were combined with the KdpA-Q116R mutation, denoted kdp-42 or strain TK2242-42 in previous work (Epstein et al., 1978; Siebers and Altendorf, 1989), which lowers K<sup>+</sup> affinity to the millimolar range and facilitates study of K<sup>+</sup>-dependence by eliminating the background activity generally observed with the WT construct (Siebers and Altendorf, 1988, 1989). Although it may be surprising that a substitution in the signature TGES sequence is tolerated, an extensive phylogenetic analysis of the P-type ATPase superfamily indicates that the serine has the greatest variability in this motif and can be substituted with T, A, R or P (Chan et al., 2010). All relevant constructs were expressed behind a pBAD promoter in K<sup>+</sup> rich media (Fig. 2); these conditions activated the pathway for serine phosphorylation, which is evident from the stimulation in ATPase activities that was observed after treatment of the KdpA-Q116R construct with LPP (Suppl. Fig. S2c). No inhibition was seen when Ser162 was mutated to Ala (KdpB-S162A) and mutations of KdpB-D307A, KdpB-E161Q and KdpB-S162D all resulted in complete inhibition of ATPase activity even after LPP treatment.



Typical experiments are shown in Figs. 5a and b, which represent the time course of EP formation at room temperature in the absence and presence of 10 mM  $K^+$  respectively. In the presence of  $K^+$ , EP levels of active constructs (e.g., S162A/Q116R) decay over time as the ATP in the solution is exhausted (Fig. 5b). In contrast, EP levels were stable in the absence of  $K^+$ , because there is no enzymatic turnover (Fig. 5a), and at 4°C, because of a much slower turnover rate (Suppl. Fig. S3). EP levels were also stable for inactive constructs such as S162D/Q116R and E161Q/S162A/Q116R. Data from 15 individual experiments have been normalized and pooled in Fig. 5c. These data included all points for experiments with low turnover rates (i.e., at 4°C or lacking  $K^+$ ) and initial points for experiments with high turnover rates (i.e., at room temperature in the presence of  $K^+$ ) or pulse chase (see below). Normalization of data from each experiment was based on data from E161Q/S162A/Q116R, which consistently produced the highest EP levels and which were stable over the course of the experiment. Thus, data in Fig. 5c indicate that Q116R and S162D constructs, which both reflect the effects of Ser162 phosphorylation, produced high levels of EP both in the presence and absence of  $K^+$ . In contrast, EP levels for the Ser162A construct, which cannot be serine phosphorylated, are much lower and showed a significant dependence on  $K^+$ . As expected, the D307A construct produced negligible levels of EP. These data suggest that formation of the high-energy aspartyl phosphate (step 2 in Fig. 1) is  $K^+$ -dependent and that phosphorylation of Ser162 not only uncouples this step but also prevents the hydrolysis of the phosphoenzyme intermediate.

The data from S162D/Q116R and E161Q/S162A/Q116R suggest that the cycle is blocked at some point after aspartyl phosphate formation. In order to determine more precisely where the cycle was blocked, we used a pulse-chase strategy to distinguish E1~P from E2-P intermediates. For this assay, we initiated phosphoenzyme formation in the presence of  $K^+$  with [ $\gamma$ - $^{32}P$ ]-ATP at 4°C where steady-state levels are stable. After 15 sec, an aliquot was removed (plotted as time zero in Fig. 5d) and a solution containing 10 mM ADP and 10 mM EDTA was added to determine the proportion of E1~P present. Fig. 5d shows that EP levels for S162A/Q116R and S162D/Q116R are immediately reduced to zero (within the time resolution of this assay). This result indicates that E1~P is the prevalent species at steady state and that serine phosphorylation prevents the molecule from progressing to the E2-P state (step 3 in Fig. 1). The E161Q/S162A/Q116R construct is expected to trap the E2-P state (Clausen et al., 2004) and, as expected, is completely unreactive with ADP.

Although steady levels of EP from S162D/Q116R are consistent with blockage of the E1~P to E2-P transition, data from the Q116R construct reflect a more complex situation. Unlike the S162D/Q116R construct, the Q116R construct generates a mixture of active (no serine phosphorylation) and inactive (serine phosphorylated) molecules. At first glance, one might expect that the fraction of inactive molecules with serine phosphorylation would produce steady EP levels while unmodified, active molecules would turnover and very slowly exhaust the ATP in the solution. However, ADP is produced as the active molecules turnover which will then react with and dephosphorylate the molecules arrested in the E1~P state, as seen in the pulse chase experiments. This behavior would then account for the observed fall in overall EP levels of partially phosphorylated Q116R mutants over time.

#### Effect of serine phosphorylation on ligand binding

An alternative explanation for the observed inhibition could be that serine phosphorylation simply slows down one of the steps of the reaction cycle or changes the affinity

for one of the substrates. To evaluate this alternative, we used ATPase activity to estimate affinities for  $K^+$  and ATP as well as inhibition by orthovanadate. Orthovanadate acts as a transition state analogue for inorganic phosphate and typically binds to the E2 state of P-type ATPases to form an inhibitory complex (Clausen et al., 2016). In this way, the  $IC_{50}$  for inhibition by orthovanadate reflects not only an intrinsic binding affinity but also the conformational equilibrium between E2 and E1 states of P-type ATPases (Toustrup-Jensen et al., 2001). For the  $K^+$  titration, we used the Q116R mutant and for the ATP and vanadate titrations we used WT protein, both with high levels of serine phosphorylation, evident from a 3-5-fold stimulation after LPP treatment (e.g.,  $V_{max} = 1.9$  and  $9.3$   $\mu\text{moles/mg/min}$  in Fig. 6b). Fitting of data from untreated and treated samples (Fig. 6a & b) indicated that differences in  $K_M$  for  $K^+$  (21 mM and 7 mM, respectively) and ATP (60  $\mu\text{M}$  and 72  $\mu\text{M}$ ) were not statistically significant. Similarly, inhibition by orthovanadate under standard ATPase conditions (150 mM  $K^+$  and 2.4 mM ATP) indicate no significant change in  $IC_{50}$  (9.2  $\mu\text{M}$  vs. 8.4  $\mu\text{M}$ ). Although not a comprehensive analysis of reaction cycle kinetics, these results reveal no significant changes in the affinity of these substrates and are therefore consistent with the interpretation that the Q116R preparation consists of a fraction of molecules with normal binding affinities and a fraction of inactive molecules with serine phosphorylation. Although we consider it unlikely, it is possible that the Q116R mutation is masking an effect of serine phosphorylation of  $K^+$  affinity on the WT protein, which is expected to be in the micromolar range (Buurman et al., 1995; Dorus et al., 2001).

Finally, we tested whether serine phosphorylation affected coupling of ATPase activity to  $K^+$  transport. As in previous work, KdpFABC was reconstituted into proteoliposomes and a voltage-sensitive dye (DiSC3) was used to report electrogenic transport of  $K^+$  into the vesicles (Fendler et al., 1996). Upon addition of ATP, a robust decrease in fluorescence indicated a buildup of a positive membrane potential (Suppl. Fig. S4). The initial part of the curve was fitted with an exponential to quantify the rate (Damjanovic and Apell, 2014a) and to compare the preparation before and after LPP treatment. This analysis shows an excellent correlation between ATPase activity and transport. If serine-phosphorylated molecules were uncoupled, thus allowing passive transport of  $K^+$  in the absence of ATPase activity, the membrane voltage generated by unphosphorylated molecules would be dissipated. Thus, these data suggest that the fraction of active molecules are fully capable of coupled transport whereas the fraction of molecules with serine phosphorylation remain coupled, but are inactive.

### Effects of serine phosphorylation on structural dynamics

We have used MD simulations to characterize the effects of serine phosphorylation on the dynamics of KdpFABC. The crystal structure (PDB code 5MRW) was used as a starting model and ten independent simulations of 200 ns were performed for molecules with and without serine phosphorylation, referred to as PHOS and SER simulations respectively. Although the crystal structure appears to represent a non-enzymatic state with a hydrogen bond network coupling the A-domain and the N-domain (Suppl. Fig. S5), this structure has significantly higher resolution (2.9  $\text{\AA}$ ) than cryo-EM structures (Stock et al., 2018) and the cytosolic domains of KdpB that include the phosphorylated TGES motif are much better defined. This model was equilibrated in a system with explicit solvent consisting of a membrane bilayer composed of 80% 1-palmitoyl-2-oleoyl-sn-glycero-3-ethanolamine and 20% 1-palmitoyl-2-oleoyl-sn-glycero-3-phosphoglycerol and an aqueous compartment composed of water and 150 mM KCl. A clear and consistent difference was observed in the mobility of the cytoplasmic domains of KdpB in PHOS and SER simulations, which is documented by RMSD distributions

which represent the entire population of conformations sampled during each set of simulations (Fig.7). Specifically, the broader distribution with larger RMSD values indicates a much higher mobility for cytoplasmic domains in the PHOS simulations.

Despite this higher mobility, the A-domain remained coupled to the N-domain over the 200 ns time scale of the PHOS simulations. In contrast, the A- and N-domains became rapidly uncoupled in the SER simulations, which lacked serine phosphorylation. These distinct behaviors are illustrated by the radial distribution functions and RMSD distributions relating the interacting residues over the course of all simulations (Suppl. Fig. S5). Specifically, the sharp peaks from the PHOS simulations indicate a sustained interaction whereas the much broader distributions from the SER simulations indicate uncoupling. This was somewhat unexpected given that cryo-EM structures showed uncoupled A- and N-domains even in the presence of serine phosphorylation. We therefore tested the effect of mutating the basic residues in the N-domain (Lys357 and Arg363) that mediate interaction with the phosphate moiety. Expression of K357A/R363A/Q116R in TK2498 cells at 0.2 mM K<sup>+</sup> (same conditions as for Fig. 3) produced a serine-phosphorylated KdpFABC complex with only modest ATPase activity (Suppl. Fig. S5g-h). LPP treatment reduced serine phosphorylation on KdpB and produced an ~4-fold stimulation in ATPase activity. This result confirms that the interaction between A- and N-domains is not responsible for the observed inhibition, thus motivating us to look more closely at the allosteric behavior of the molecule.

In order to quantify the conformational dynamics in these simulations, a covariance and principal components analysis was performed. We plotted each frame from the simulations against the first two eigenvectors of the covariance matrix to characterize the global collective motion (Fig 8, Suppl. Fig. S6). This plot reveals three clusters, corresponding to three distinct protein conformations that were sampled by the simulations. The clusters and corresponding structural conformations reflect free energy minima in the energy landscape of the simulations. Although the prevalent conformation (marked as B) is well sampled in both conformations, two alternative conformations (marked as C and D), are reached only in the PHOS simulations, which had higher overall variance. A *k*-means clustering algorithm was used to extract representative structures from each conformational cluster, which are illustrated in Figs. 8b-d. In conformations unique to the PHOS simulations, the A-domain moves away from the P-domain and toward the membrane. As mentioned above, the N-domain remains tethered via the phosphorylated TGES motif and is thus pulled in the same direction.

A detailed inspection of the trajectories reveal significant structural changes in the region that links the A-domain to the transmembrane helices. In particular, an interaction between Glu87 on M2 and Arg212 on M3 is disrupted in the PHOS simulations in conjunction with an unwinding of the helical M2 linker (Fig. 9). Although Figs. 9a & b are snapshots from the simulation, the radial density distribution in Fig. 9c represents all the trajectories and documents the disruption of this interaction in PHOS simulations. As a result of this disruption, a cavity opens from the membrane domain to the cytosol in the PHOS simulation. This cavity is sufficiently large (>1.4 Å radius) to allow water molecules and ions to access the canonical substrate binding site near Pro264 on M4 of KdpB.

## DISCUSSION

In this study, our goal was to explore the inhibitory effects of serine phosphorylation on KdpFABC that was first described in Huang et al. (Huang et al., 2017). Our results show that



phosphorylation of Ser162 on KdpB inhibits both ATPase and K<sup>+</sup> transport of KdpFABC without affecting substrate affinities or energy coupling. We document that this posttranslational modification is a physiological response to elevated K<sup>+</sup> concentrations in the growth media. Whereas kdpFABC expression is induced by K<sup>+</sup>-deficient media, a return to K<sup>+</sup>-rich media gives rise to serine phosphorylation and inhibition of transport. This response explains earlier studies in which cell-based K<sup>+</sup> uptake by KdpFABC was inactivated under similar conditions (Rhoads et al., 1978; Roe et al., 2000). The work by Roe et al. (Roe et al., 2000) also showed that the inhibition was irreversible, that the effect was specific to K<sup>+</sup> and not due to osmotic upshock, which in any case would be very modest with the addition of only 20 mM KCl. Although these authors showed complete inhibition in cell based assays of transport, we achieved only ~75% maximal inhibition of purified protein after much longer incubation times in K<sup>+</sup>-rich media (90 min vs 2 min). This difference might reflect the much higher expression levels used for the current study. Specifically, we employed a multicopy plasmid in order to produce high levels of protein expression suitable for biochemical purification compared to the single chromosomal copy used in previous work. The higher expression level might affect the extent of the phosphorylation either by exceeding the capacity of the (still unknown) kinase system or by changing the ionic balance of cells and thus influencing the sensing mechanism. In any case, the inability to completely inhibit KdpFABC is likely to be detrimental to the cells, either by exhausting ATP levels or by creating an ionic imbalance. Either effect could interfere with progressive inhibition during long K<sup>+</sup> shock experiments (e.g., the 90 min time point in Fig. 4c) and affect the overall viability of the culture.

P-type ATPases are subject to a variety of regulatory strategies, but the inhibition of KdpFABC by phosphorylation of the TGES motif represents a novel approach for this superfamily. In the case of plasma-membrane Ca<sup>2+</sup>-ATPase (PMCA) (Cali et al., 2017), yeast and plant H<sup>+</sup>-ATPases (Haruta et al., 2015), and the yeast lipid flippase (Drs2p) (Jacquot et al., 2012), the pumps are held in autoinhibited states by C-terminal domains. Similarly, phospholamban (PLB) and sarcolipin (SLN) are regulatory subunits that inhibit Ca<sup>2+</sup>-ATPase from sarcoplasmic reticulum (SERCA) (Primeau et al., 2018) and FxYD proteins regulate Na/K-ATPase (Garty and Karlish, 2005). In most cases, these regulatory domains/subunits interact with the conserved catalytic domains to prevent turnover; distinct physiological factors bind to or modify these regulatory domains/subunits to disrupt these interactions and allow catalytic domains to function. These stimulatory factors are diverse and include Ca<sup>2+</sup>/calmodulin for PMCA, phosphatidylinositol-4-phosphate for Drs2p and serine phosphorylation for the others. The regulatory mechanism for KdpFABC is novel in that the modification inhibits rather than stimulates the transport cycle and that the modification is applied directly to one of the catalytic domains rather than to an accessory structural element.

Although serine phosphorylation is well known in eukaryotes, there are relatively few examples in bacteria. More commonly, signaling cascades in bacteria involve phosphorylation of histidine or aspartate residues, typically involving two-component systems such as KdpD/E. Correspondingly, few Ser/Thr kinases have been identified in bacteria. In fact, a catalogue of bacterial signal transduction systems lists only two eukaryotic-like Ser/Thr kinases in *E. coli*: ubiB and yegl (Galperin et al., 2010). The former is involved in the ubiquinone biosynthesis pathway (Poon et al., 2000), whereas the latter has been characterized *in vitro* but its function *in vivo* remains unknown (Rajagopalan et al., 2018). These Ser/Thr kinases have been proposed to originate in eukaryotes and their presence in bacteria to be the result of horizontal gene transfer (Lai et al., 2016). If so, it would seem unlikely that a process as fundamental as osmotic

homeostasis would be acquired by this mechanism. Atypical Ser/Thr kinases have also been reported in prokaryotes, such as the Hpr kinase that controls metabolism of carbon sources in gram positive bacteria, SpoIIAB, RsbT and RsbW that act on sigma factors to control sporulation and stress response in *B. subtilis* (Pereira et al., 2011), and AceK in *E. coli* that phosphorylates isocitrate dehydrogenase to control metabolism through the TCA cycle (Cortay et al., 1988). Their involvement in regulation of KdpFABC is worth considering. An intriguing alternative is that KdpB engages in autophosphorylation; if so, it must be very inefficient or require special conditions, because self-inhibition did not occur over the time course of our ATPase assays, nor has it been reported in the literature. High levels of phosphorylation observed on the D307A/Q116R mutant (Fig. 3b) preclude a direct transfer from Asp307 to Ser162. The alternative is that phosphate transfers directly from ATP to Ser162, but the complete lack of signal in EP formation experiments using the D307A mutation (Fig. 5) is inconsistent with this idea. Another intriguing possibility is that KdpD, which is already designed to sense the  $K^+$  need of the cell (Schramke et al., 2016), would regulate activity of a Ser/Thr kinase that targets KdpFABC, as has been seen in several other systems (Pereira et al., 2011).

The dependence of serine phosphorylation on cell growth conditions and its inhibitory effects on KdpFABC has important ramifications for our understanding of the reaction cycle. Earlier biochemical studies concluded that formation of E1~P was  $K^+$ -independent, that  $K^+$  bound to the E2-P state and was transported across the membrane during hydrolysis of the aspartyl phosphate (Damjanovic and Apell, 2014b; Siebers and Altendorf, 1989). According to this scheme,  $K^+$  transport by KdpFABC is analogous to  $K^+$  transport by  $Na^+/K^+$ -ATPase (Goldshleger et al., 2001) or lipid by lipid flippases (Jacquot et al., 2012). However, this conclusion is at odds with recent structural studies in which KdpB adopted an E1-like structural state when  $K^+$  was bound in the selectivity filter of KdpA (Huang et al., 2017; Stock et al., 2018). In the current biochemical experiments, we also observed high levels of EP formation in the absence of  $K^+$  as reported in earlier work, but only when KdpB was serine phosphorylated or carried the S162D mutation to mimic serine phosphorylation. In contrast, when the S162A mutation was used to prevent this phosphorylation, we observed much lower levels of EP formation and a clear dependence on the presence of  $K^+$ . The lower levels of EP for the S162A construct in the presence of  $K^+$  likely reflects turnover conditions which reduce the fraction of time spent in one of the phosphoenzyme states (E1~P or E2-P). Inactive constructs, such as S162D, E161Q, and the serine phosphorylated species are essentially stuck in one of these phosphoenzyme states. ADP-sensitivity seen in the pulse chase experiments show that E1~P is the prevalent species and that serine phosphorylation prevents, or at least greatly slows down, the E1~P to E2-P transition. In contrast, the E161Q mutation is known to interfere with hydrolysis of the aspartyl phosphate {Clausen, 2004 #2555}, thus preventing the E2-P to E2 transition and, as expected, the phosphoenzyme formed by this construct does not react with ADP. We conclude, therefore, that formation of E1~P by functional KdpFABC molecules is dependent on  $K^+$  binding by KdpA from the periplasm and that  $K^+$  is likely imported across the membrane during the transition from E1~P to the E2-P state.

MD simulations reveal dramatic differences in the dynamics of KdpFABC and allosteric changes associated with serine phosphorylation. In particular, serine phosphorylation appears to have altered the conformational landscape, thus allowing the molecule to adopt unique conformations involving changes in the linker between the A-domain and transmembrane helices of KdpB. Considering conformational changes in other P-type ATPases (Møller et al., 2010), this region is expected to undergo dynamic changes during the reaction cycle and to play

a role in controlling access to the canonical substrate binding site on M4. Specifically, movements of the M1/M2 helices are coupled with rotations of the P-domain in SERCA that control occlusion of  $\text{Ca}^{2+}$  at this site (Sorensen et al., 2004). Similarly, movements of M1/M2 helices in lipid flippases control access of their substrate, phosphatidylserine, to this same region (Hiraizumi et al., 2019). Furthermore, a mapping of water molecules from our simulations indicates that the canonical binding site in KdpB is far more accessible in the PHOS simulations (Suppl. Fig. 7). Thus, the allosteric effects of serine phosphorylation could be to allow cytosolic ions access to this canonical binding site, thereby triggering the conformational change leading to E1~P in an unnatural and non-selective way. Normally,  $\text{K}^+$  binding to KdpA from the periplasm is required for this step, but this aberrant behavior would explain our biochemical data showing a loss of  $\text{K}^+$  dependence caused by serine phosphorylation.

Once E1~P is formed, our biochemical data suggest that serine phosphorylation prevents KdpFABC from progressing to the E2-P state. E2-P is characterized by the loss of ADP sensitivity, which results from an interaction between the TGES<sup>162</sup> loop and the aspartyl phosphate (Asp307). It seems plausible that a phosphate moiety on Ser162 would interfere with this interaction, thus preventing formation of E2-P as well as the ensuing hydrolysis of the aspartyl phosphate that is normally orchestrated by Glu161. This mechanism of inhibition differs from our earlier speculation that the hydrogen bond network between the serine phosphate and the N-domain simply held the protein in the inactive conformation seen in the X-ray structure (Huang et al., 2017). Although this bonding network was retained in current 200 ns simulations, we anticipate that it would be unstable over longer time scales. Indeed, this interaction was not seen in the more recent cryo-EM structures (Stock et al., 2018) and mutations designed to break up this interaction (the K357A/R363A) had no effect on the inhibitory properties of serine phosphorylation (Suppl. Fig. S5h). This is not surprising given the lack of conservation for this region of the N-domain and specifically for the two basic residues that mediate the interaction. Interestingly, the cryo-EM structures show that both E1 and E2-P like conformations can be adopted by serine phosphorylated KdpFABC, which might appear to contradict our biochemical data. However, our studies of EP formation were designed to study the cycle initiated by ATP addition (clockwise in Fig. 1), whereas E2-P can also be formed directly from phosphate by so-called back-door phosphorylation (reversal of steps 4 and 5 in Fig. 1). Although this step is energetically unfavorable, it may have been facilitated by the presence of  $\text{AlF}_4$  in samples used for the cryo-EM studies.

In conclusion, our work has characterized a novel mechanism for regulating P-type ATPases and the physiological importance for  $\text{K}^+$  homeostasis in bacteria. Fundamental questions remain regarding the mechanism of KdpFABC, including the role of a unique tunnel that runs between the subunits and the path taken by  $\text{K}^+$  as it crosses the membrane. Given effects on enzymatic cycle, efforts should be made to ensure that serine phosphorylation is not a factor in future structural and biochemical work on this intriguing membrane pump.

#### Acknowledgements

We thank Jingjing Deng for initial mass spectrometry analyses. Mass spectra data has been deposited in the MassIVE repository (MSV000084906). The work was supported by NIH grants R01 GM108043 to DLS and S10 RR027990 to TAN, and by funding from the European

Research Council (grant agreement No. 637372) and the Independent Research Fund Denmark (grant agreement No. DFF-8021-00161) to BPP.

## Methods

### Expression of KdpFABC complex

For studies of serine phosphorylation, the pSD107 plasmid was transformed into *E. coli* strain TK2499 (both from W. Epstein, Univ. of Chicago), which lacks all other K<sup>+</sup> transport systems with genotype F<sup>-</sup>, thi, rha, lacZ, nagA, trkA405, trkD1,  $\Delta$ (kdpFABC)5,  $\Delta$ (ompT) (Fig. 2). This plasmid was originally derived from pBR322 and contained the kdpFABC operon along with its endogenous promoter and an 8x histidine tag at the C-terminus of kdpC. Cells were grown in 4 L flasks at 31°C in K0-medium (46 mM Na<sub>2</sub>PO<sub>4</sub>, 23 mM NaH<sub>2</sub>PO<sub>4</sub>, 25 mM (NH<sub>4</sub>)<sub>2</sub>SO<sub>4</sub>, 0.4 mM MgSO<sub>4</sub>, 6  $\mu$ M FeSO<sub>4</sub>, 1 mM sodium citrate, 0.2% glucose, 1  $\mu$ g/mL thiamine, 50  $\mu$ g/mL carbenicillin) supplemented with additions of 10  $\mu$ M KCl every 90 min after culture density reached an OD<sub>600</sub> of ~0.1. Total culture volumes ranged between 4-9 L. Cells were harvested at an OD<sub>600</sub> of ~0.3-0.4 by centrifugation at 3500g for 20 min; the resulting cell pellets were frozen at -80°C for storage. For K<sup>+</sup> shock experiments, the culture was divided into equal portions and 20 mM KCl was added from a 2M stock solution followed by further incubation for defined periods of time prior to harvest.

To generate site-specific Ala mutants, site-directed PCR mutagenesis was used to alter codons in the WT operon on the plasmid described above. These plasmids were transformed into *E. coli* strain TK2498 with genotype F<sup>-</sup>, thi, rha, lacZ, nagA, trkA405, trkD1, kdpA-Q116R,  $\Delta$ (ompT), also from W. Epstein (Fig. 2). Unlike TK2499, this strain carries a chromosomal copy of kdpFABC with the Q116R mutation on kdpA, which lowers potassium affinity to ~6 mM and has been identified as kdp-42 or kdpA42 in previous publications (Epstein et al., 1978; Siebers and Altendorf, 1989). This tag-less copy served to maintain cell survival in the low K<sup>+</sup> conditions required to induce pump expression in cases where the alanine mutant complexes were inactive. For expression, cells were incubated overnight at 37°C in 10 mL K5-medium (K0-medium supplemented with 5 mM KCl). This culture was transferred to 500 mL K1-medium (K0-medium supplemented with 1 mM KCl) and incubated at 37°C for 8 h. The 500 mL cell culture was transferred again to 18 L K0.2-medium (K0-medium supplemented with 0.2 mM KCl) and incubated at 31°C to induce expression of kdpFABC. Cells were harvested at a culture density of OD<sub>600</sub> = ~0.8 by centrifugation at 3500g for 20 min at 4°C and cell pellets were either frozen or used immediately for purification.

For studies of EP formation, the kdpFABC operon with the 8x histidine tag was cloned into the pBAD vector (Invitrogen, Carlsbad CA) and introduced into *E. coli* strain Top10 (Invitrogen). Cells were grown in 4L flasks at 37°C in LB media supplemented with 100 mg/mL ampicillin to an OD<sub>600</sub> of 0.5. Expression was then induced by addition of 0.02% arabinose and the culture continued to grow at 37°C for 4 h. Cells were then harvested by centrifugation as above and frozen for storage. Total culture volumes were typically 2 L.

### Purification of KdpFABC

For purification of the KdpFABC complex, cells were resuspended in 50 mM Tris pH 7.5, 1.2 M NaCl, 10 mM MgCl<sub>2</sub>, 10% glycerol, protease inhibitor tablets (Roche, Basel Switzerland) and 1 mM DTT, and lysed with an Emulsiflex C3 high-pressure homogenizer (Avestin, Ottawa

Canada). Whole cells and debris were removed by centrifugation for 15 min at 12,000g, and membranes were pelleted by centrifugation for 2.5 h at 90,140g. Membranes were solubilized by overnight incubation in 50 mM Tris pH 7.5, 600 mM NaCl, 10 mM MgCl<sub>2</sub>, 10% glycerol, 1 mM TCEP and 1.2% n-decyl-β-maltoside (DM) at 4°C using 20 mL per gram of membrane. After centrifugation for 30 min at 90,140g, the solution was loaded on a 5 mL Ni-NTA HiTrap chelating column (GE Healthcare, Chicago IL) that was equilibrated in Ni-NTA base buffer (50 mM Tris pH 7.5, 600 mM NaCl, 10 mM MgCl<sub>2</sub>, 10% glycerol, 1 mM TCEP, and 0.15% DM) supplemented with 20 mM imidazole. The column was washed with 20 mL of this same buffer, followed by 20 mL of Ni-NTA base buffer supplemented with 50 mM imidazole. Stepwise 5 mL elutions (collected in 1.5 mL fractions) were then performed as the imidazole concentration was incremented in steps of 50 mM up to a final concentration of 300 mM imidazole. Alternatively, elution was done with a continuous gradient running from 50 - 500 mM imidazole. The fractions containing KdpFABC were pooled, concentrated to ~0.7 mL using a 100 kDa cut-off Amicon centrifugal filter (Sigma Aldrich, St. Louis MO) and introduced onto a Superdex 200 size exclusion column (GE Healthcare) pre-equilibrated with 25 mM Tris pH 7.5, 100 mM KCl, 10% glycerol, 1 mM TCEP, and 0.15% DM. For measurements of EP formation, the NaCl was substituted for KCl during this purification. Fractions were either stored for short periods (days) at 4°C or frozen in liquid nitrogen and stored at -80°C.

### Quantification of serine phosphorylation

The Phospho-Tag™ phosphoprotein gel stain kit (ABP Biosciences, Beltsville MD) was used to evaluate levels of serine phosphorylation. Specifically, 20 μg of precipitated protein was resuspended in sodium dodecylsulfate (SDS) buffer and run on a 10% SDS-PAGE gel. After staining according to manufacturer's instructions, gels were imaged in a Chemidoc imaging system (BioRad, Hercules CA) using the epi-green illumination for Cy3 fluorescence. KdpB-S162A was used as a negative control and a normalization factor for band intensities.

Localization of the site of serine phosphorylation and estimation of stoichiometry were done by nano-liquid chromatography-tandem mass spectrometry (nano-LC-MS/MS). Slices from SDS gels were digested with 500 ng trypsin solution (10 ng/μL) (Promega, Madison WI) in 50 mM NH<sub>4</sub>HCO<sub>3</sub> and incubated for 4 h at 37°C, followed by 500 ng GluC or AspN protease (Promega) overnight. Digestion was stopped with 10% formic acid and peptides extracted with 5% formic acid in 50% acetonitrile, followed by final extraction with acetonitrile. Combined peptide pools were concentrated to a small droplet by centrifugation under vacuum. The resulting peptides were desalted using a Stage Tip manually packed with Empora C18 High Performance Extraction Disks (3M) (Rappsilber et al., 2007). Desalted peptide pools were dried under vacuum to a small droplet, and finally reconstituted to 20 μL with 0.1% formic acid.

LC-MS/MS was performed with a ThermoEasy nLC 1000 ultra high-pressure UPLC system (ThermoFisher Scientific, Waltham MA) coupled online to a Q Exactive HF mass spectrometer with NanoFlex source (ThermoFisher Scientific). Analytical columns (25-30 cm long and 75 μm inner diameter with 8 μm spray needle) were packed in-house with ReproSil-Pur C18 AQ 3μm reversed-phase resin (Dr. Maisch GmbH, Ammerbuch-Entringen, Germany). The analytical column was placed in a column heater (Sonation GmbH, Biberach, Germany) regulated to a temperature of 45°C. The peptide pool was loaded onto the analytical column with buffer A (0.1% formic acid) at a maximum back-pressure of 300 bar; peptides were eluted with a 2-step gradient of 3% to 40% buffer B (100% ACN and 0.1% formic acid) over 40 min and 40% to 90% B over 5 min, at a flow rate of 250 nL/min over 60 min before direct infusion into the



mass spectrometer. Mass spectrometric data were acquired using a data-dependent (DDA) top-15 method, dynamically choosing the most abundant, not-yet-sequenced precursor ions from the survey scans (300–1750 Th). Peptide fragmentation was performed via higher energy collisional dissociation with a target value of  $10^6$  ions. Precursors were isolated with a window of 1.6 Th, survey scans were acquired with a resolution of 120,000 at  $m/z$  200 and HCD spectra with 15,000 at  $m/z$  200.

Mass spectra were first processed with Proteome Discoverer 1.4 and then compared with a SwissProt Database with a Taxonomy filter for E coli (22,982 sequences) from 072014 using Mascot (Matrix Science, London, UK). Decoy protein sequences with a reversed order were included to estimate false discovery rates, which averaged ~1% at protein and peptide levels. Peptide spectral matches were further analyzed with Thermo Scientific Xcalibur software. Phosphoserine peptide ion intensities (within 5 ppm of calculated mass) were manually extracted, and intensity ratios of singly phosphorylated peptides relative to total (phosphorylated and nonphosphorylated) peptide intensities were calculated for each sample.

### Activity Assays

Rates for ATP hydrolysis were measured with a coupled enzyme assay (Warren et al., 1974) with 5  $\mu$ g of purified KdpFABC in a total volume of 0.5 mL at 25°C. The assay buffer contained 75 mM TES pH 7, 150 mM KCl, 7.5 mM MgCl<sub>2</sub>, 9.6 U/mL lactate dehydrogenase, 9.6 U/mL pyruvate kinase, 2.4 mM ATP, 0.5 mM phosphoenol-pyruvate, 0.36 mM NADH, and 0.15% DM. Concentrations of KCl and ATP were varied for determination of  $K_M$ . Orthovanadate was prepared by adjusting the pH of a 200 mM solution of sodium orthovanadate to 10 using NaOH, boiling until the yellow color cleared, cooling to room temperature, and repeating this cycle until the pH stabilized. Assays were run in triplicate and data from titrations with K<sup>+</sup>, ATP and VO<sub>4</sub> were fit using Prism8 software (GraphPad Software, San Diego CA).

For measurement of K<sup>+</sup> transport, KdpFABC was reconstituted into proteoliposomes using the method of Levy et al. (Levy et al., 1992). Specifically, a thin film of lipid (3:1 weight ratio of E. coli polar extract and 1-palmitoyl-2-oleoyl-sn-glycero-3-phosphocholine (Avanti Polar Lipids, Alabaster AL) was prepared by evaporating a chloroform stock solution (25 mg/ml) with Ar followed by 2 h in a vacuum chamber. This dry film was resuspended in transport buffer (20 mM HEPES pH 7.2, 5 mM MgSO<sub>4</sub>, 140 mM potassium sulfamate, 1 mM N-methyl-D-glucamine sulfamate) to make a 10 mg/mL lipid stock solution, which was subjected to five cycles of freezing and thawing using liquid N<sub>2</sub>. The stock solution was then extruded 13 times through a 400 nm nucleopore filter (Whatman plc, Maidstone UK) to create homogenous, unilamellar liposomes. Proteoliposomes were made at a lipid:protein weight ratio of 20:1 by combining 1.25 mg liposomes, 62.5  $\mu$ g of KdpFABC, and 375  $\mu$ g Triton X-100 (Sigma Aldrich) in a total volume of 250  $\mu$ L. This solution was stirred at room temperature for 30 min followed by addition of 7.5 mg BioBeads (BioRad) and a further 90 min incubation. Finally, 15 mg BioBeads were added before overnight incubation with stirring at 4°C. Reconstituted proteoliposomes were harvested and bath-sonicated 3 times for 10 sec each before use in the transport assay.

The transport assay was performed as described by Damjanovic et. al. (Damjanovic et al., 2013) using the voltage-sensing dye DiSC3 (Anaspec, Fremont CA). The fluorescent signal was measured with a Fluoromax-4 spectrofluorimeter (Horiba Scientific, Piscataway NJ) with excitation at 650 nm (5 nm slit), and emission at 675 nm (5 nm slit). Each assay was done in 2 mL reaction volumes comprising 25  $\mu$ L proteoliposomes diluted in a transport buffer consisting

of 25 mM HEPES pH 7.2, 5 mM magnesium sulfamate, 140 mM potassium sulfamate and 1 mM N-methyl-D-glucamine sulfamate, followed by the addition of 1  $\mu$ M DiSC3 from a 1 mM stock in DMSO. Electrogenic transport by inside-out KdpFABC molecules was initiated by addition of 2 mM ATP, and the subsequent drop in fluorescence was fit to an exponential curve in order to calculate initial rate of transport. Assays were performed in triplicate.

For measurements of EP formation, aliquots of purified KdpFABC were diluted to 0.25 mg/ml in 50 mM HEPES pH 7.8, 2 mM MgCl<sub>2</sub>, 0.15% DM and 10 mM of either KCl or NaCl. The reaction was started by addition of 100  $\mu$ M [ $\gamma$ 32P]-ATP and 200  $\mu$ l aliquots containing 25  $\mu$ g of protein and 2.7  $\mu$ Ci were taken at intervals of 0, 15, 30, 60, 120 sec and quenched with 300  $\mu$ l of 35% ice cold trichloroacetic acid (TCA). For the pulse-chase experiments, samples were incubated for 15 sec at 4°C, an aliquot was recovered followed by addition of 10 mM ADP and 10 mM EDTA with additional aliquots taken various time intervals. After completing the assay, aliquots were centrifuged for 10 min at 14,000g and washed twice with either 5% ice-cold TCA (for filtration) or water (for SDS-PAGE). For filtration, pellets were resuspended in 500  $\mu$ L 5% TCA, filtered with 0.22 mm MCE filters (MilliporeSigma, Burlington MA) and washed 3 times with 5% TCA. Radioactivity was then quantified with a scintillation counter. For SDS-PAGE, the pellets were resuspended in 30  $\mu$ L of 5 mM TRIS-phosphate pH 5.8, 6.7 M urea, 0.4 M DTT, 5% SDS, 0.014% bromophenol blue. The stacking gel contained 4% polyacrylamide, 65 mM TRIS-phosphate pH 5.5, 0.1 % SDS. The resolving gel contained 7.5% polyacrylamide, 65 mM TRIS-phosphate pH 6.5, 0.1 % SDS. The running buffer was 0.17 M MOPS pH 6 and 0.1% SDS. Gels were dried and exposed to a storage phosphor screen overnight which was then imaged with a Typhoon Trio+ (GE Healthcare). For each construct, data was obtained from 3-4 independent cell expression/purification procedures and individual samples were measured in triplicate.

## MD Simulations

To set up the system for simulation, a bilayer containing 550 lipid molecules was constructed using CHARMM-GUI with a 4:1 ratio of 1-palmitoyl-2-oleoyl-sn-glycero-3-ethanolamine (POPE) and 1-palmitoyl-2-oleoyl-sn-glycero-3-phosphoglycerol (POPG). The published crystal structure for KdpFABC (PDB: 5MRW), including the bound K<sup>+</sup> ion, water molecule and protein subunits, was introduced into the bilayer with the help of the PPM server associated with the Orientations of Proteins in Membranes database ([https://opm.phar.umich.edu/ppm\\_server](https://opm.phar.umich.edu/ppm_server)). Finally, the system was hydrated with 75,000 water molecules with 150 mM of KCl in this aqueous phase.

All-atom MD simulations were carried out using GROMACS (Abraham et al., 2015) version 2016.3 under periodic boundary conditions. We utilized the TIP3P water model with Lennard-Jones interactions on hydrogen atoms. Non-bonded neighbor list was limited by a cutoff of 12 Å and was updated every 10 steps. The van der Waals interactions were turned off between 10 to 12 Å. The particle mesh Ewald (PME) method was used to model electrostatic interactions. All systems were minimized using steepest descent algorithm for 5000 steps. For each system - phosphorylated (PHOS) and not phosphorylated (SER) - ten independent simulations were run starting with different initial velocities. For each simulation, the converged system was equilibrated for 5 ns with backbone restraints on the protein followed by a production run of 200 ns. The temperature of the system was maintained at 310K with the Nose-Hoover thermostat after an equilibration run, which was performed with the Berendsen thermostat. The pressure was maintained at 1 bar with the Parrinello-Rahman barostat with a semi-isotropic pressure coupling scheme. The Linear Constraint Solver (LINCS) algorithm was

utilized to constrain all bonds carrying hydrogen. A 2 fs time step was used and trajectories were sampled every 20 ps. The data analysis was carried out using GROMACS and python scripts. Snapshots were rendered using Visual Molecular Dynamics (VMD) (Humphrey et al., 1996).

Covariance and Principal Components Analysis was performed for the protein backbone atoms after accounting for bulk translation and rotation of the molecule. A covariance matrix  $C$  was extracted from atomic fluctuations

$$\mathbf{C} = \langle (\mathbf{x}(t) - \langle \mathbf{x} \rangle)(\mathbf{x}(t) - \langle \mathbf{x} \rangle)^T \rangle \quad (1)$$

where  $\mathbf{x}$  is a 3N-dimensional column vector describing the 3-dimensional coordinates of the N protein backbone atoms, and  $\mathbf{x}(t)$  are the spatial coordinates at time t. The triangular brackets indicate an ensemble average. The 3Nx3N symmetric matrix C was then diagonalized by a coordinate transformation R

$$\mathbf{C} = \mathbf{R}\mathbf{\Lambda}\mathbf{R}^T \quad (2)$$

$$\mathbf{\Lambda} = \mathbf{R}^T \mathbf{C} \mathbf{R} \quad (3)$$

This orthogonal transformation converts C into a diagonal matrix  $\mathbf{\Lambda} = \text{diag}(\lambda_1, \lambda_2, \dots, \lambda_{3N})$ , which contains the eigenvalues  $\lambda_i$  of the covariance matrix C. The  $i$ th column of  $\mathbf{R}$  contains the  $i$ th eigenvector  $\mathbf{r}_i$  with the corresponding eigenvalue  $\lambda_i$ . The global collective motions of the trajectory were then obtained by projecting the trajectory ensemble onto individual eigenvectors, to generate the principal components  $p_i$ ,  $i = (1, 2, \dots, N)$ , by taking an internal product between the transpose of the eigenvector and the atomic fluctuation

$$p_i(t) = \mathbf{r}_i \cdot (\mathbf{x}(t) - \langle \mathbf{x} \rangle) \quad (4)$$

Each trajectory snapshot, thus projected on two different eigenvectors, yields one point on the point cloud distributions shown in Fig. 8.

## Competing Interests

The authors have no competing or non-competing financial interests to disclose.

## References

- Abraham, M.J., Murtola, T., Schulz, R., Páll, S., Smith, J.C., Hess, B., and Lindahl, E. (2015). GROMACS: High performance molecular simulations through multi-level parallelism from laptops to supercomputers. *SoftwareX* 1--2, 19 - 25, 10.1016/j.softx.2015.06.001.
- Altendorf, K., Booth, I.R., Gralla, J., Greie, J.C., Rosenthal, A.Z., and Wood, J.M. (2009). Osmotic Stress. *EcoSal Plus* 3, 10.1128/ecosalplus.5.4.5.
- Ballal, A., Basu, B., and Apte, S.K. (2007). The Kdp-ATPase system and its regulation. *J Biosci* 32, 559-568, 10.1007/s12038-007-0055-7.
- Buurman, E.T., Kim, K.T., and Epstein, W. (1995). Genetic evidence for two sequentially occupied K<sup>+</sup> binding sites in the Kdp transport ATPase. *J Biol Chem* 270, 6678-6685, 10.1074/jbc.270.12.6678.
- Cali, T., Brini, M., and Carafoli, E. (2017). Regulation of Cell Calcium and Role of Plasma Membrane Calcium ATPases. *Int Rev Cell Mol Biol* 332, 259-296, 10.1016/bs.ircmb.2017.01.002.
- Chan, H., Babayan, V., Blyumin, E., Gandhi, C., Hak, K., Harake, D., Kumar, K., Lee, P., Li, T.T., Liu, H.Y., *et al.* (2010). The p-type ATPase superfamily. *J Mol Microbiol Biotechnol* 19, 5-104, 10.1159/000319588.
- Clausen, J.D., Bublitz, M., Arnou, B., Olesen, C., Andersen, J.P., Moller, J.V., and Nissen, P. (2016). Crystal Structure of the Vanadate-Inhibited Ca(2+)-ATPase. *Structure* 24, 617-623, 10.1016/j.str.2016.02.018.
- Clausen, J.D., Vilsen, B., McIntosh, D.B., Einholm, A.P., and Andersen, J.P. (2004). Glutamate-183 in the conserved TGES motif of domain A of sarcoplasmic reticulum Ca<sup>2+</sup>-ATPase assists in catalysis of E2/E2P partial reactions. *Proc Nat Acad Sci* 101, 2776-2781.
- Cortay, J.C., Bleicher, F., Rieul, C., Reeves, H.C., and Cozzone, A.J. (1988). Nucleotide sequence and expression of the aceK gene coding for isocitrate dehydrogenase kinase/phosphatase in *Escherichia coli*. *J Bacteriol* 170, 89-97, 10.1128/jb.170.1.89-97.1988.
- Damnjanovic, B., and Apell, H.J. (2014a). KdpFABC reconstituted in *Escherichia coli* lipid vesicles: substrate dependence of the transport rate. *Biochem* 53, 5674-5682, 10.1021/bi5008244.
- Damnjanovic, B., and Apell, H.J. (2014b). Role of protons in the pump cycle of KdpFABC investigated by time-resolved kinetic experiments. *Biochem* 53, 3218-3228, 10.1021/bi500336w.
- Damnjanovic, B., Weber, A., Potschies, M., Greie, J.C., and Apell, H.J. (2013). Mechanistic analysis of the pump cycle of the KdpFABC P-type ATPase. *Biochem* 52, 5563-5576, 10.1021/bi400729e.
- Dorus, S., Mimura, H., and Epstein, W. (2001). Substrate-binding clusters of the K<sup>+</sup>-transporting Kdp ATPase of *Escherichia coli* investigated by amber suppression scanning mutagenesis. *J Biol Chem* 276, 9590-9598, 10.1074/jbc.M009365200.
- Epstein, W. (2003). The roles and regulation of potassium in bacteria. *Prog Nucleic Acid Res Mol Biol* 75, 293-320, 10.1016/s0079-6603(03)75008-9.
- Epstein, W. (2015). The KdpD Sensor Kinase of *Escherichia coli* Responds to Several Distinct Signals To Turn on Expression of the Kdp Transport System. *J Bacteriol* 198, 212-220, 10.1128/JB.00602-15.

- Epstein, W., and Davies, M. (1970). Potassium-dependant mutants of *Escherichia coli* K-12. *J Bacteriol* *101*, 836-843.
- Epstein, W., Whitelaw, V., and Hesse, J. (1978). A K<sup>+</sup> transport ATPase in *Escherichia coli*. *J Biol Chem* *253*, 6666-6668.
- Fendler, K., Drose, S., Altendorf, K., and Bamberg, E. (1996). Electrogenic K<sup>+</sup> transport by the Kdp-ATPase of *Escherichia coli*. *Biochem* *35*, 8009-8017, 10.1021/bi960175e.
- Galperin, M.Y., Higdon, R., and Kolker, E. (2010). Interplay of heritage and habitat in the distribution of bacterial signal transduction systems. *Mol Biosyst* *6*, 721-728, 10.1039/b908047c.
- Garty, H., and Karlish, S.J. (2005). Role of FXYD Proteins in Ion Transport. *Annu Rev Physiol*, 10.1146/annurev.physiol.68.040104.131852.
- Goldshleger, R., Patchornik, G., Shimon, M.B., Tal, D.M., Post, R.L., and Karlish, S.J. (2001). Structural organization and energy transduction mechanism of Na<sup>+</sup>,K<sup>+</sup>-ATPase studied with transition metal-catalyzed oxidative cleavage. *J Bioenerg Biomembr* *33*, 387-399, 10.1023/a:1010615422932.
- Haruta, M., Gray, W.M., and Sussman, M.R. (2015). Regulation of the plasma membrane proton pump (H<sup>+</sup>)-ATPase) by phosphorylation. *Curr Opin Plant Biol* *28*, 68-75, 10.1016/j.pbi.2015.09.005.
- Hiraizumi, M., Yamashita, K., Nishizawa, T., and Nureki, O. (2019). Cryo-EM structures capture the transport cycle of the P4-ATPase flippase. *Science* *365*, 1149-1155, 10.1126/science.aay3353.
- Huang, C.S., Pedersen, B.P., and Stokes, D.L. (2017). Crystal structure of the potassium-importing KdpFABC membrane complex. *Nature* *546*, 681-685, 10.1038/nature22970.
- Huang, Z., Marsiglia, W.M., Basu Roy, U., Rahimi, N., Ilghari, D., Wang, H., Chen, H., Gai, W., Blais, S., Neubert, T.A., *et al.* (2016). Two FGF Receptor Kinase Molecules Act in Concert to Recruit and Transphosphorylate Phospholipase Cgamma. *Mol Cell* *61*, 98-110, 10.1016/j.molcel.2015.11.010.
- Humphrey, W., Dalke, A., and Schulten, K. (1996). VMD: visual molecular dynamics. *J Mol Graph* *14*, 33-38, 27-38, 10.1016/0263-7855(96)00018-5.
- Jacquot, A., Montigny, C., Hennrich, H., Barry, R., le Maire, M., Jaxel, C., Holthuis, J., Champeil, P., and Lenoir, G. (2012). Phosphatidylserine stimulation of Drs2p.Cdc50p lipid translocase dephosphorylation is controlled by phosphatidylinositol-4-phosphate. *J Biol Chem* *287*, 13249-13261, 10.1074/jbc.M111.313916.
- Jung, K., and Altendorf, K. (2002). Towards an understanding of the molecular mechanisms of stimulus perception and signal transduction by the KdpD/KdpE system of *Escherichia coli*. *J Mol Microbiol Biotechnol* *4*, 223-228.
- Jung, K., Fried, L., Behr, S., and Heermann, R. (2012). Histidine kinases and response regulators in networks. *Curr Opin Microbiol* *15*, 118-124, 10.1016/j.mib.2011.11.009.
- Laermann, V., Cudic, E., Kipschull, K., Zimmann, P., and Altendorf, K. (2013). The sensor kinase KdpD of *Escherichia coli* senses external K<sup>+</sup>. *Mol Microbiol* *88*, 1194-1204, 10.1111/mmi.12251.
- Lai, S., Safaei, J., and Pelech, S. (2016). Evolutionary Ancestry of Eukaryotic Protein Kinases and Choline Kinases. *J Biol Chem* *291*, 5199-5205, 10.1074/jbc.M115.691428.



- Levy, D., Gulik, A., Bluzat, A., and Rigaud, J.-L. (1992). Reconstitution of the sarcoplasmic reticulum Ca<sup>++</sup>-ATPase: mechanisms of membrane protein insertion into liposomes during reconstitution procedures involving detergents. *Biochim Biophys Acta* 1107, 283-298, 10.1016/0005-2736(92)90415-i.
- Møller, J.V., Olesen, C., Winther, A.M., and Nissen, P. (2010). The sarcoplasmic Ca<sup>2+</sup>-ATPase: design of a perfect chemi-osmotic pump. *Quarterly reviews of biophysics* 43, 501-566, 10.1017/S003358351000017X.
- Palmgren, M.G., and Nissen, P. (2011). P-type ATPases. *Annual review of biophysics* 40, 243-266, 10.1146/annurev.biophys.093008.131331.
- Pereira, S.F., Goss, L., and Dworkin, J. (2011). Eukaryote-like serine/threonine kinases and phosphatases in bacteria. *Microbiol Mol Biol Rev* 75, 192-212, 10.1128/MMBR.00042-10.
- Poon, W.W., Davis, D.E., Ha, H.T., Jonassen, T., Rather, P.N., and Clarke, C.F. (2000). Identification of *Escherichia coli* ubiB, a gene required for the first monooxygenase step in ubiquinone biosynthesis. *J Bacteriol* 182, 5139-5146, 10.1128/jb.182.18.5139-5146.2000.
- Primeau, J.O., Armanious, G.P., Fisher, M.E., and Young, H.S. (2018). The SarcoEndoplasmic Reticulum Calcium ATPase. *Subcell Biochem* 87, 229-258, 10.1007/978-981-10-7757-9\_8.
- Rajagopalan, K., Dworkin, J., and Nagle, E. (2018). Identification and Biochemical Characterization of a Novel Protein Phosphatase 2C-Like Ser/Thr Phosphatase in *Escherichia coli*. *J Bacteriol* 200, 10.1128/JB.00225-18.
- Rappsilber, J., Mann, M., and Ishihama, Y. (2007). Protocol for micro-purification, enrichment, pre-fractionation and storage of peptides for proteomics using StageTips. *Nat Protoc* 2, 1896-1906, 10.1038/nprot.2007.261.
- Rhoads, D.B., Laimins, L., and Epstein, W. (1978). Functional organization of the kdp genes of *Escherichia coli* K-12. *J Bacteriol* 135, 445-452.
- Roe, A.J., McLaggan, D., O'Byrne, C.P., and Booth, I.R. (2000). Rapid inactivation of the *Escherichia coli* Kdp K<sup>+</sup> uptake system by high potassium concentrations. *Mol Microbiol* 35, 1235-1243, 10.1046/j.1365-2958.2000.01793.x.
- Schramke, H., Tostevin, F., Heermann, R., Gerland, U., and Jung, K. (2016). A Dual-Sensing Receptor Confers Robust Cellular Homeostasis. *Cell Rep* 16, 213-221, 10.1016/j.celrep.2016.05.081.
- Siebers, A., and Altendorf, K. (1988). The K<sup>+</sup>-translocating Kdp-ATPase from *Escherichia coli*. Purification, enzymatic properties and production of complex- and subunit-specific antisera. *Eur J Biochem* 178, 131-140.
- Siebers, A., and Altendorf, K. (1989). Characterization of the phosphorylated intermediate of the K<sup>+</sup>-translocating Kdp-ATPase from *Escherichia coli*. *J Biol Chem* 264, 5831-5838.
- Sorensen, T.L., Moller, J.V., and Nissen, P. (2004). Phosphoryl transfer and calcium ion occlusion in the calcium pump. *Science* 304, 1672-1675, 10.1126/science.1099366.
- Stock, C., Hielkema, L., Tascon, I., Wunnicke, D., Oostergetel, G.T., Azkargorta, M., Paulino, C., and Hanelt, I. (2018). Cryo-EM structures of KdpFABC suggest a K(+) transport mechanism via two inter-subunit half-channels. *Nat Commun* 9, 4971, 10.1038/s41467-018-07319-2.
- Su, J., Gong, H., Lai, J., Main, A., and Lu, S. (2009). The potassium transporter Trk and external potassium modulate *Salmonella enterica* protein secretion and virulence. *Infect Immun* 77, 667-675, 10.1128/IAI.01027-08.

Toustrup-Jensen, M., Hauge, M., and Vilsen, B. (2001). Mutational effects on conformational changes of the dephospho- and phospho-forms of the Na<sup>+</sup>,K<sup>+</sup>-ATPase. *Biochem* 40, 5521-5532, 10.1021/bi002367m.

Trotschel, C., Albaum, S.P., and Poetsch, A. (2013). Proteome turnover in bacteria: current status for *Corynebacterium glutamicum* and related bacteria. *Microb Biotechnol* 6, 708-719, 10.1111/1751-7915.12035.

Walderhaug, M.O., Polarek, J.W., Voelkner, P., Daniel, J.M., Hesse, J.E., Altendorf, K., and Epstein, W. (1992). KdpD and KdpE, proteins that control expression of the kdpABC operon, are members of the two-component sensor-effector class of regulators. *J Bacteriol* 174, 2152-2159, 10.1128/jb.174.7.2152-2159.1992.

Warren, G.B., Toon, P.A., Birdsall, N.J., Lee, A.G., and Metcalfe, J.C. (1974). Reconstitution of a Calcium-Pump Using Defined Membrane Components. *Proc Nat Acad Sci* 71, 622-626, DOI 10.1073/pnas.71.3.622.

Xu, C.F., Lu, Y., Ma, J., Mohammadi, M., and Neubert, T.A. (2005). Identification of phosphopeptides by MALDI Q-TOF MS in positive and negative ion modes after methyl esterification. *Mol Cell Proteomics* 4, 809-818, 10.1074/mcp.T400019-MCP200.

## Figure Legends

Figure 1. The Post-Albers scheme for the reaction cycle of P-type ATPases. The cycle alternates between two major conformations denoted E1 and E2. The E1 state binds ATP and produces the high-energy aspartyl phosphoenzyme intermediate (E1~P), which remains reactive with ADP. A spontaneous transition produces the low-energy E2-P intermediate, which no longer reacts with ADP but instead undergoes hydrolysis to produce the E2 species.

Figure 2. Bacterial strains used to express various KdpFABC mutants. The TK2498 strain contains a chromosomal copy of kdpFABC that carries the KdpA-Q116R mutation behind the native promoter. This gene rescues the cells in K<sup>+</sup>-deficient media (0.2 mM), which also serves to induce expression not only of the chromosomal copy, but also of His-tagged mutants on plasmids derived from pSD107, which carries the same native promoter. The genotype is shown below together with mutants expressed from this strain. The TK2499 strain has the same genotype as TK2498, except that it lacks the chromosomal copy of kdpFABC. It was used for expression of the His-tagged WT protein, which is induced at μM K<sup>+</sup> concentrations. This strain was used for K<sup>+</sup> shock experiments. The Top10 strain was used for expression of several His-tagged mutants behind the pBAD promoter grown in standard LB media and induced with arabinose. This strain was used for expression of proteins for biochemical assays of aspartyl phosphate formation. The mutants and their expression conditions are summarized in Suppl. Table 1.

Figure 3. Survey of alanine substitution mutants reveals inhibition and serine phosphorylation of KdpB. (A) Very low levels of ATPase activity were obtained from a series of Ala substitution mutants. As indicated in Suppl. Table 1, WT protein has been expressed in TK2499 at very low levels of K<sup>+</sup>, whereas the other constructs were expressed in TK2498 at 200 μM K<sup>+</sup>. (B) Mass spectrometry of these Ala mutants revealed high levels of phosphorylation of Ser162 on KdpB. (C) Treatment of several of these mutants with LPP to remove serine phosphorylation resulted in significant stimulation of ATPase activity, supporting the notion that serine phosphorylation is inhibitory. Data in panels A and B are single measurements, whereas data in panel C was done in triplicate.

Figure 4. K<sup>+</sup> shock leads to serine phosphorylation of KdpB and inhibition of ATPase activity. For these experiments, TK2499 cells were cultured at low K<sup>+</sup> concentrations to induce expression of WT kdpFABC; thereafter, the culture was split and one half was subjected to 20 mM K<sup>+</sup> for varying periods of time. (A) A 20 min K<sup>+</sup> shock resulted in loss of ~40% of ATPase activity, which was fully recovered by LPP treatment. (B) Serine phosphorylation levels for samples from panel A determined by mass spectrometry were much higher after K<sup>+</sup> shock. (C) ATPase rates from additional individual experiments with varying periods of K<sup>+</sup> shock. The time periods are nominal because harvest of cells required a 20 min centrifugation in their respective media. (D) Serine phosphorylation levels for samples in panel C determined by Phos-tag staining of SDS gels show an increase in serine phosphorylation levels that is proportional to the observed inhibition of ATPase activity. (E) ATPase activities from a single culture split into 4 batches and treated with K<sup>+</sup> for variable times show a graded inhibitory response. (F) Levels of serine phosphorylation for the cultures in panel E were determined by Phos-tag staining. (G) Data from all experiments were combined and show a reasonable correlation (R=0.56) between ATPase activity and levels of serine phosphorylation determined by mass spectrometry. (H) Correlation of ATPase activities from all the experiments with levels of serine phosphorylation determined by Phos-tag staining produces a much better correlation (R=0.97). (I) Correlation of

serine phosphorylation levels from mass spectrometry and Phos-tag staining. ATPase measurements were performed in triplicate and shown as mean plus SEM; phosphoserine levels represent single measurements.

Fig. 5. Steady-state levels of aspartyl phosphate (EP). (A-B) Individual experiments comparing time-dependence of EP formation at room temperature of several different constructs in the absence (A) or presence (B) of 10 mM K<sup>+</sup>. EP formation was initiated by addition of [ $\gamma^{32}$ -P]-ATP and aliquots were taken at various time intervals and quenched with TCA. The constructs are indicated in the legend. (C) Aggregated data from 15 individual experiments that have been normalized relative to levels for the E161Q construct. (D) Pulse-chase experiment in which samples have been incubated for 15 s with [ $\gamma^{32}$ -P]-ATP at 4°C to achieve maximal levels of EP (plotted at time zero) followed by addition of 10 mM ADP and 10 mM EDTA for the indicated time periods. Data was collected in triplicate and lines are drawn through mean values at each time point. Error bars in panel C correspond to SEM.

Figure 6. Substrate affinities are not affected by serine phosphorylation. (A) For K<sup>+</sup> titrations, the KdpA-Q116R mutant was expressed with the pBAD system, which produced high levels of serine phosphorylation (see Suppl. Fig. 2). K<sup>+</sup>-dependence curves show that TPP treatment increased  $V_{max}$  significantly from 2.4 to 5.8  $\mu$ moles/mg/min, but that differences in  $K_M$  (21.5 mM vs. 7.0 mM) were not statistically significant at the 95% confidence level. (B) ATP dependence of WT protein was fitted with  $V_{max} = 1.9$  and 9.3  $\mu$ moles/mg/min for untreated and treated samples respectively with insignificant change in  $K_M$  (60 vs 73  $\mu$ M). (C) Titrations of WT protein with orthovanadate produced maximal activities of 1.7 and 8.7  $\mu$ moles/mg/min for untreated and treated samples and  $IC_{50}$  values of 9.2 and 8.4  $\mu$ M, respectively. Data were collected in triplicate and fitted with the Michaelis Menton equation (A,B) and inhibitor-response equation (C) in Prism8.

Figure 7. Dynamics of the cytoplasmic domains during MD simulation depended on serine phosphorylation. (A-C) Distributions of root mean square deviations relative to the starting model for the three cytoplasmic domains, A, N, and P, during the PHOS (blue) and SER (orange) simulations. All three domains are more mobile in the PHOS simulations compared to the SER simulations.

Figure 8. Principle component analysis of conformations sampled during the simulations. (A) Projection of individual frames from all simulations onto the first two eigenvectors (PC1 and PC2) from the covariance matrix of the PHOS simulations. The prevalent conformation represented by the cloud labeled B is sampled by both PHOS and SER simulations. However, the PHOS simulation has sampled novel conformations represented by the peripheral clouds labeled C and D. Projections onto each individual axis are shown as histograms along the top and right margins. (B-D) Structures extracted by k-means analysis of panel A from clouds B, C and D, respectively. Cytoplasmic domains are colored as follows: A-domain yellow, N-domain red, P-domain blue; transmembrane helices are grey and boundaries of the membrane are indicated by horizontal lines.

Figure 9. Allosteric effects of serine phosphorylation. (A) Snapshot from the SER simulations shows an interaction between Glu87 and Arg212 (shown as sticks) on the regions linking the A-domain to M2 and M3, respectively. The canonical substrate binding site for P-type ATPases is indicated with relevant side chains (Pro264, Asp583, Lys586) shown as sticks. (B) Snapshot from the PHOS simulations shows that interactions between Glu87 and Arg212 are

disrupted and a cavity is detected by CAVER (green surface) that leads to the canonical binding site. No cavity was detected in the structures from the SER simulations. (C) Radial distribution function representing distances between Glu87 and Arg212 for all states sampled by the simulations. Higher peaks for SER simulations indicate persistent interactions between these residues, whereas the lower peaks for PHOS simulations indicate that these interactions are disrupted. (D) Helical content was determined from phi/psi angles for the linker between M2 and the A-domain (residues 68-92). This helix becomes unwound in the PHOS simulations.



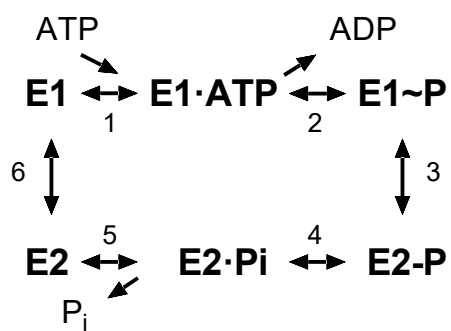

Figure 1

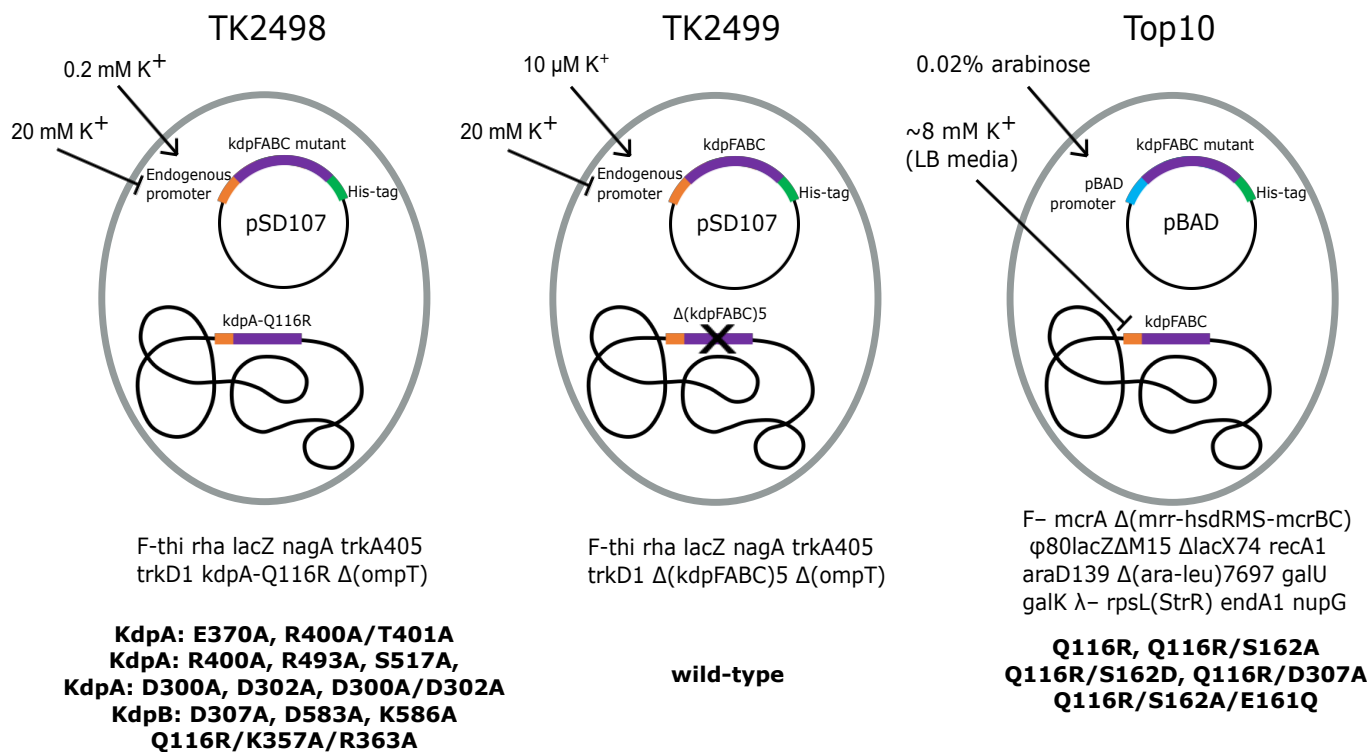

Figure 2

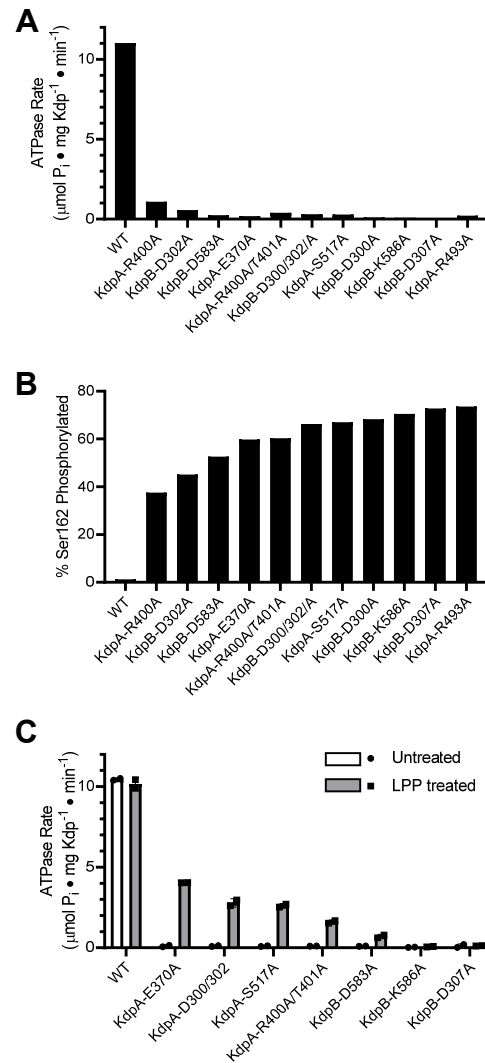

Figure 3

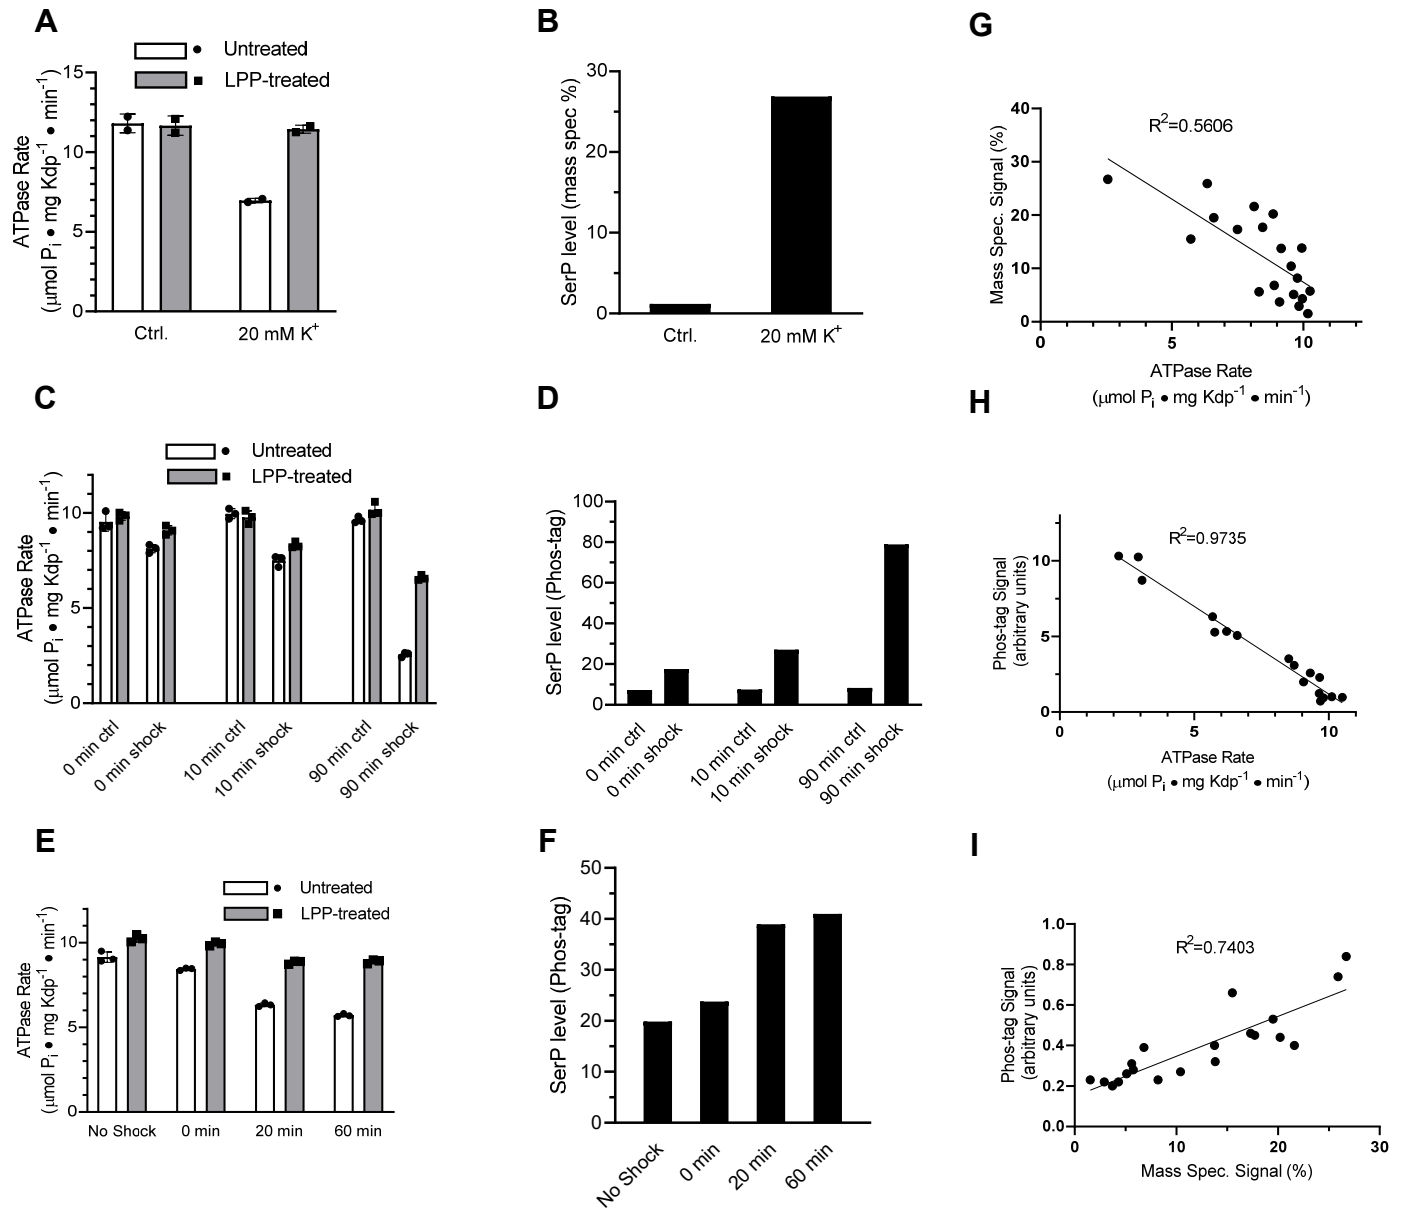

Figure 4

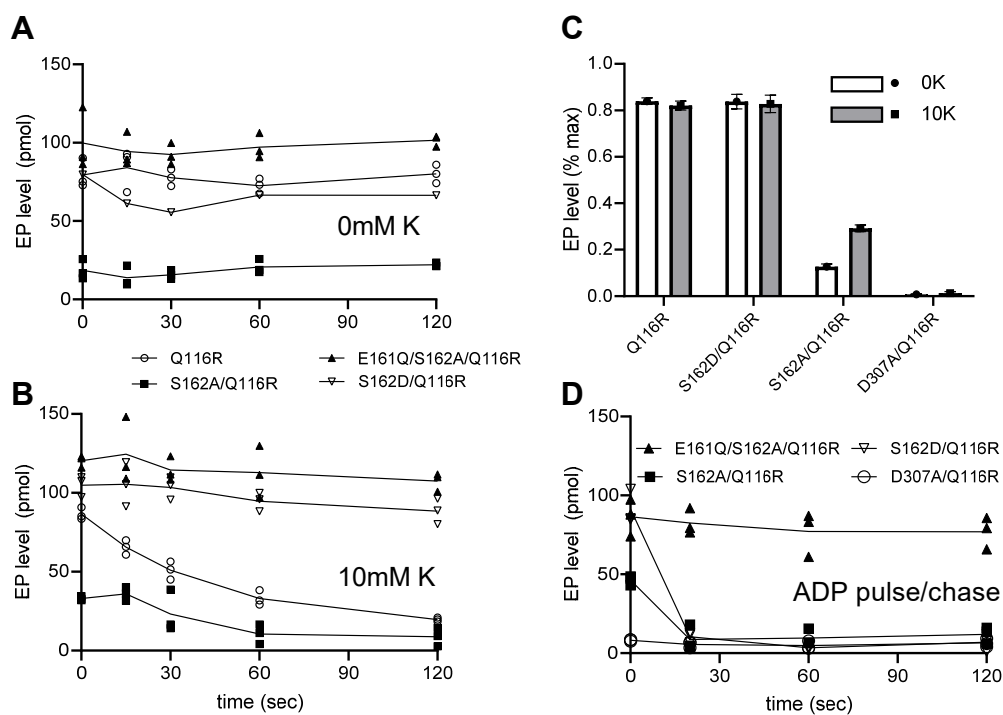

Figure 5



**A**

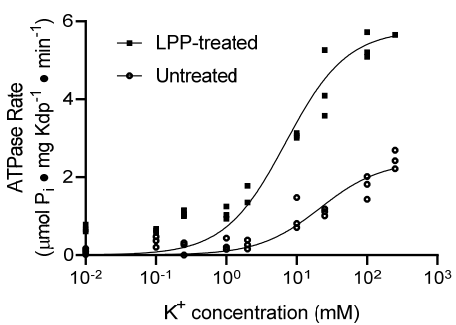

**B**

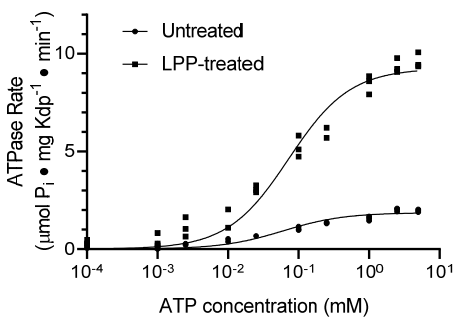

**C**

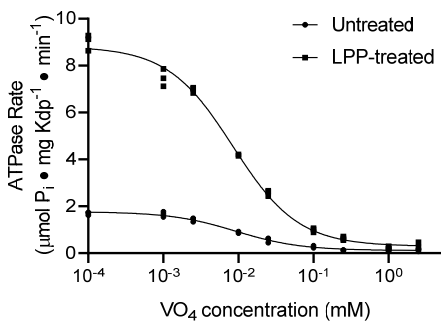

Figure 6

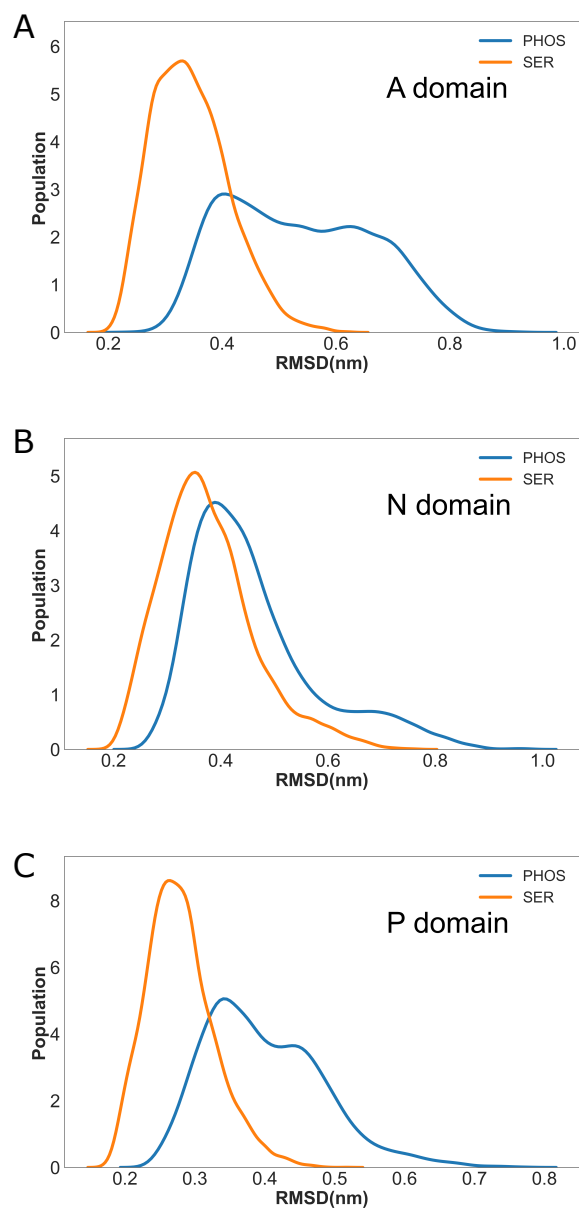

Figure 7

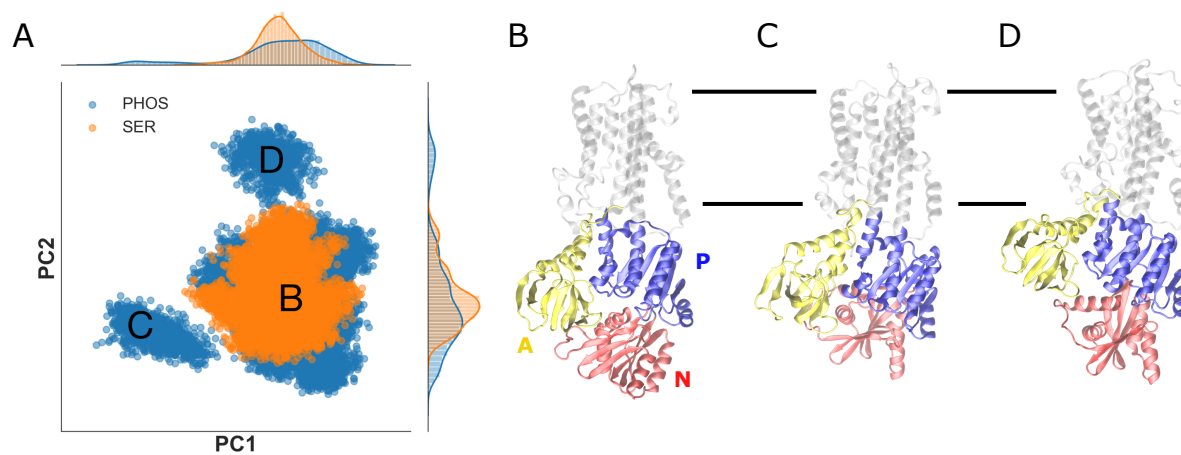

Figure 8

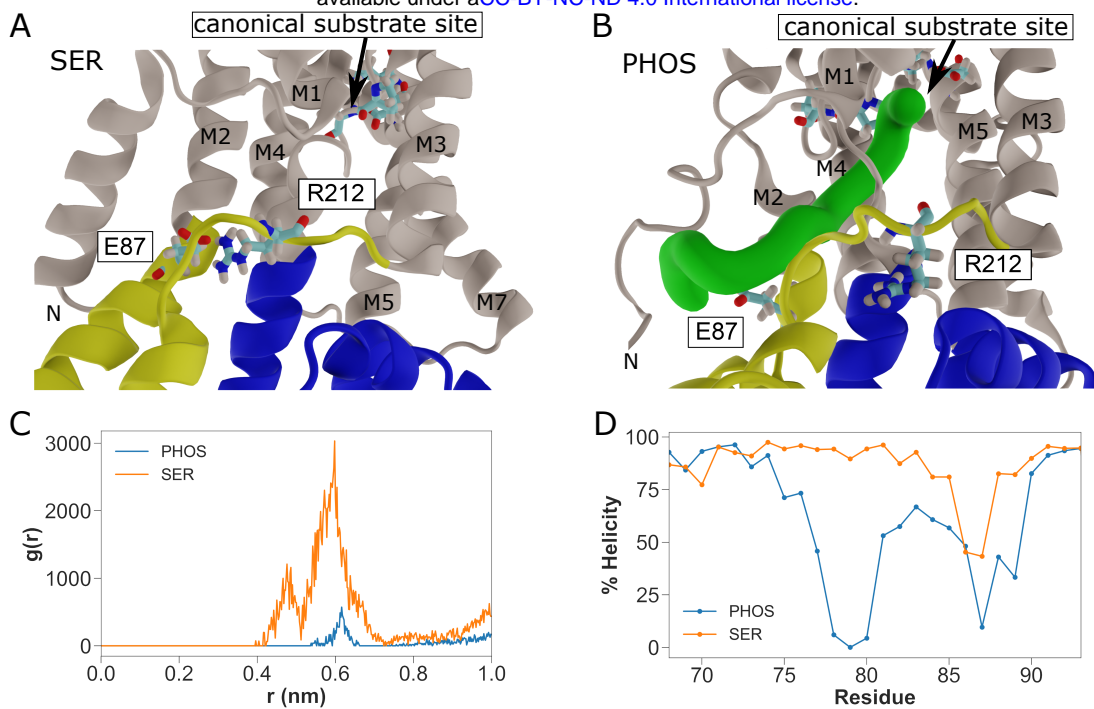

Figure 9
